# Supplementary material
Source: MDPI journal article supplement (https://www.mdpi.com/1424-2818/15/11/1155)
Supplement: s1 [file s1]

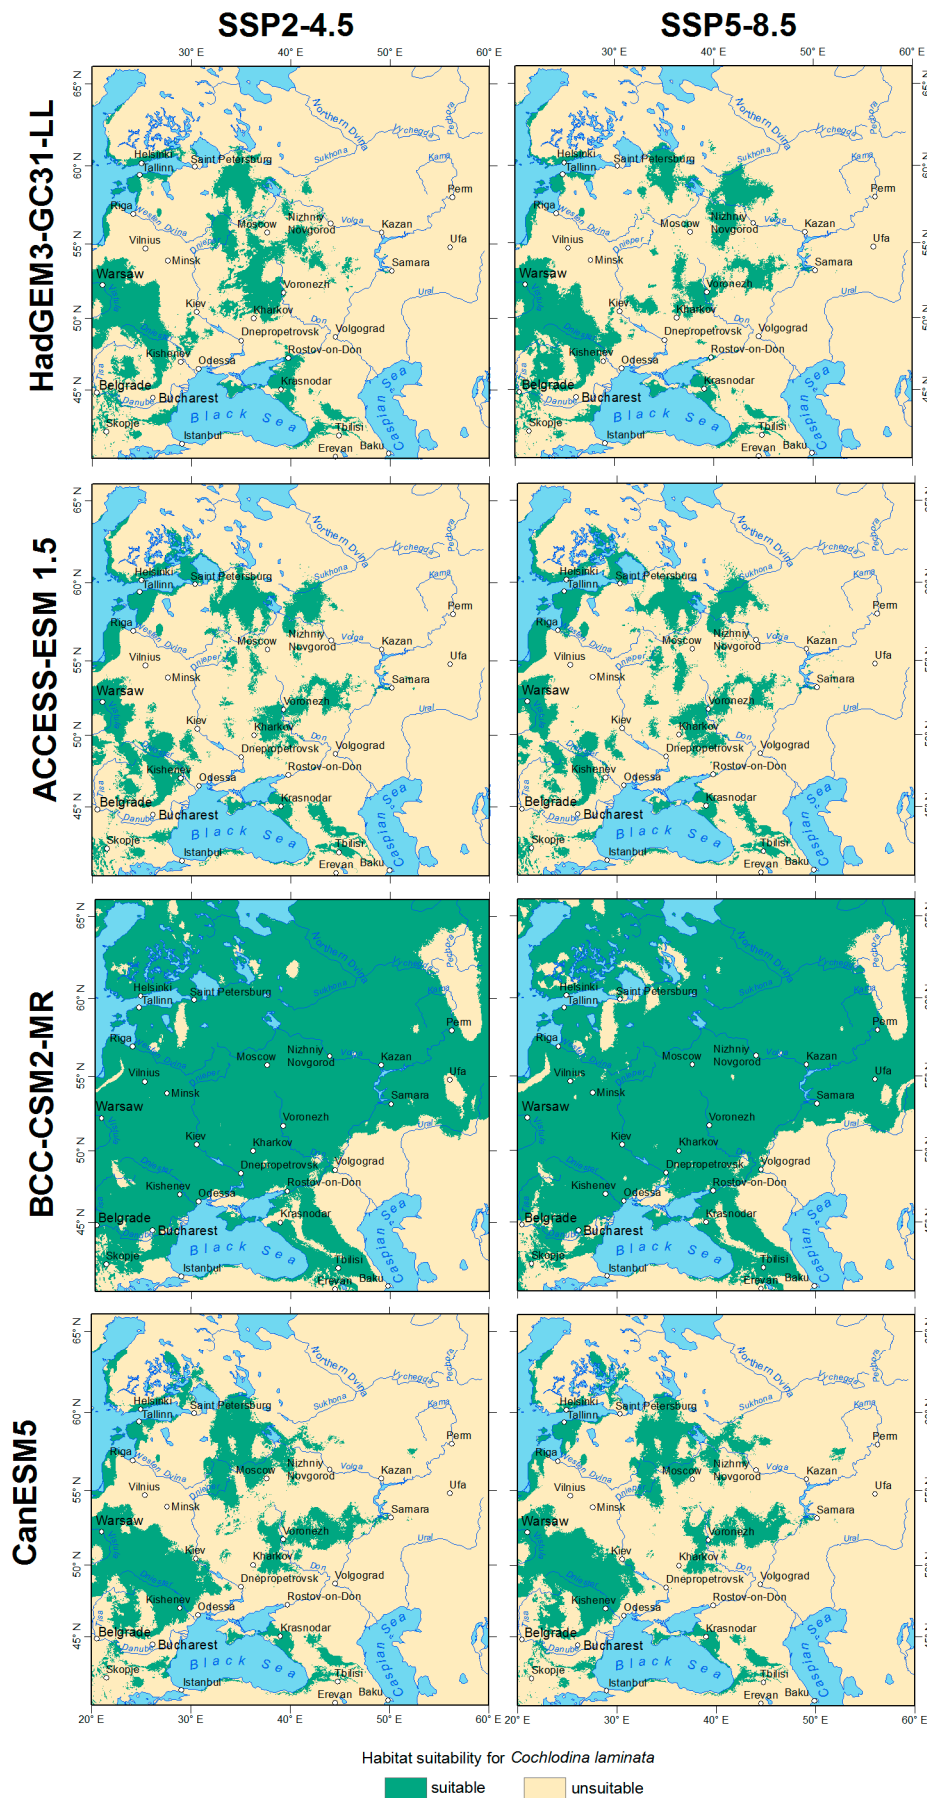

Figure S1: *C. laminata* future habitat suitability according to tested three algorithms' types based on four climate models for 2041 – 2060.

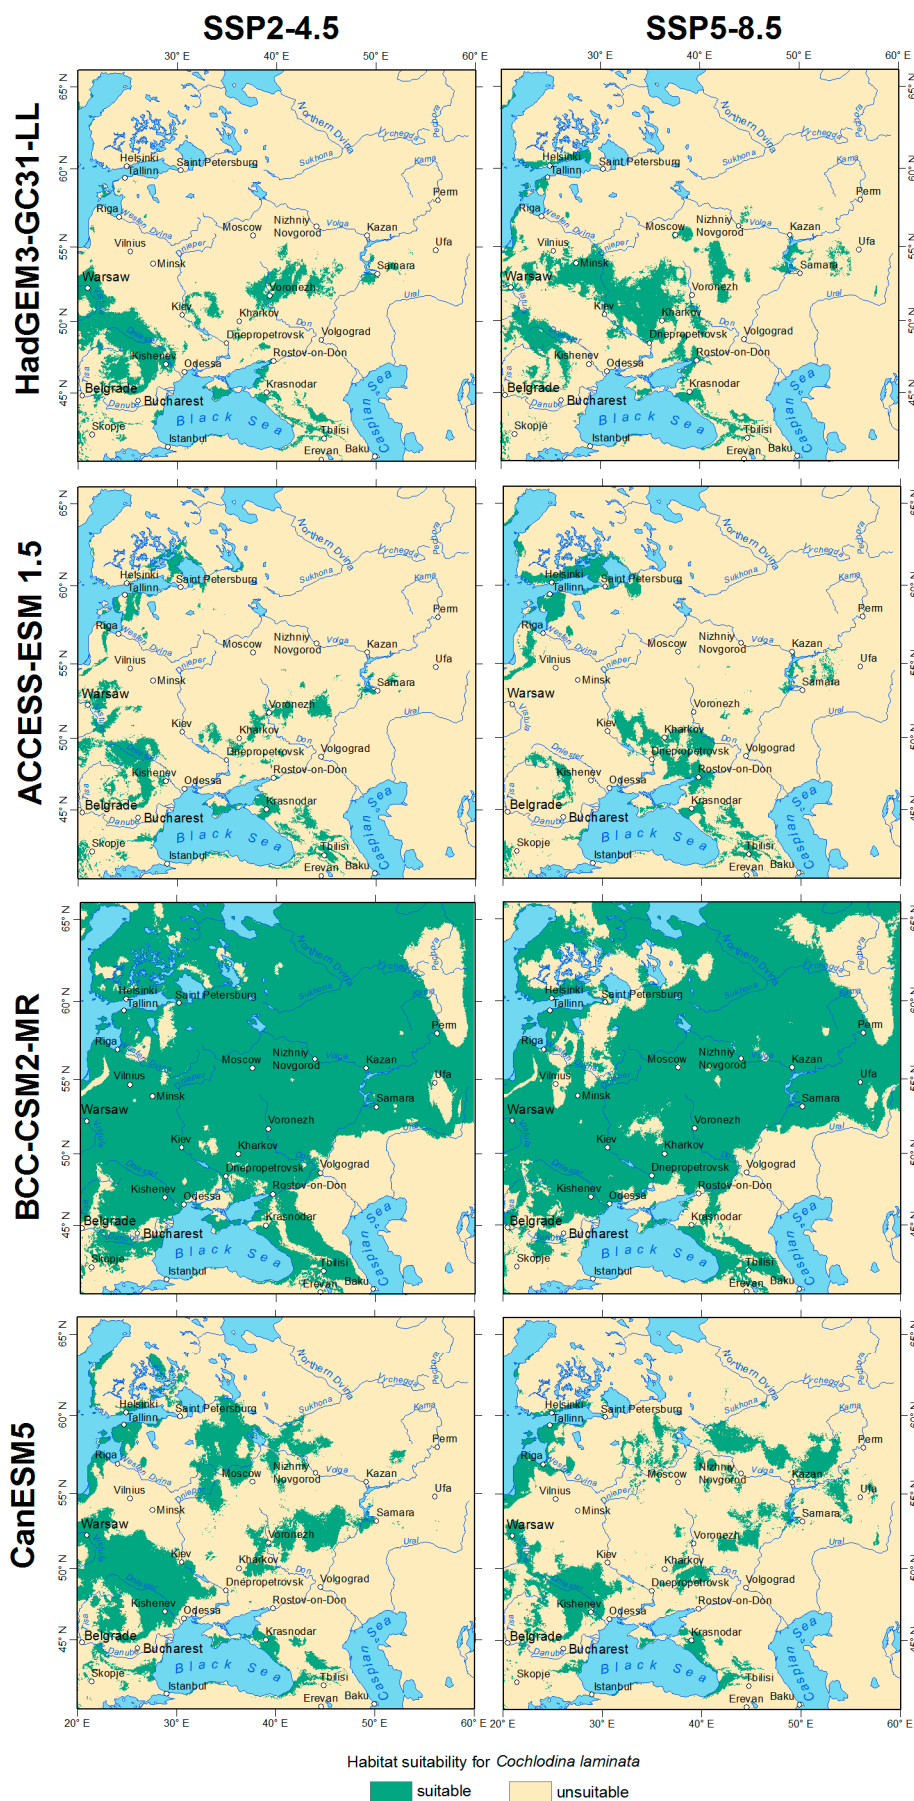

Figure S2: *C. laminate* future habitat suitability according to tested three algorithms' types based on four climate models for 2081--2100.
